# Supplementary material
Source: Springer Nature journal article supplement (https://www.springermedizin.de/resource/supplementary/12875_2006_225_MOESM4_ESM.pdf/9436542)

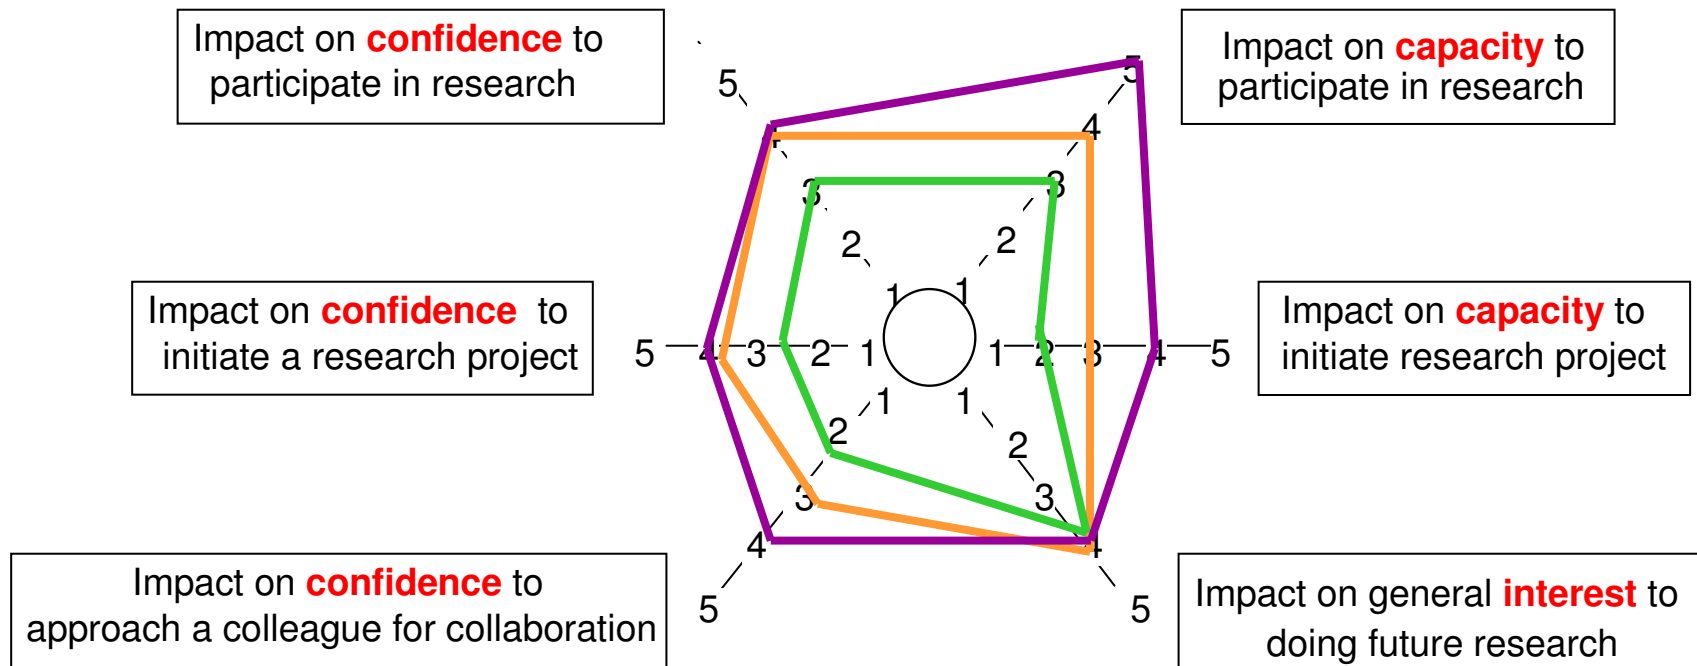

- Writing Grant holders (n=10)
- Bursary holders (n=21)
- Research Fellows (n=3)

1 = no impact  
5 = substantial impact

Supplement: MOESM4 [file 9436542]
